# Supplementary material
Source: PubMed Central journal article supplement (PMC2596764)
Supplement: NIHMS67901-supplement-1.pdf [file NIHMS67901-supplement-1.pdf]

a

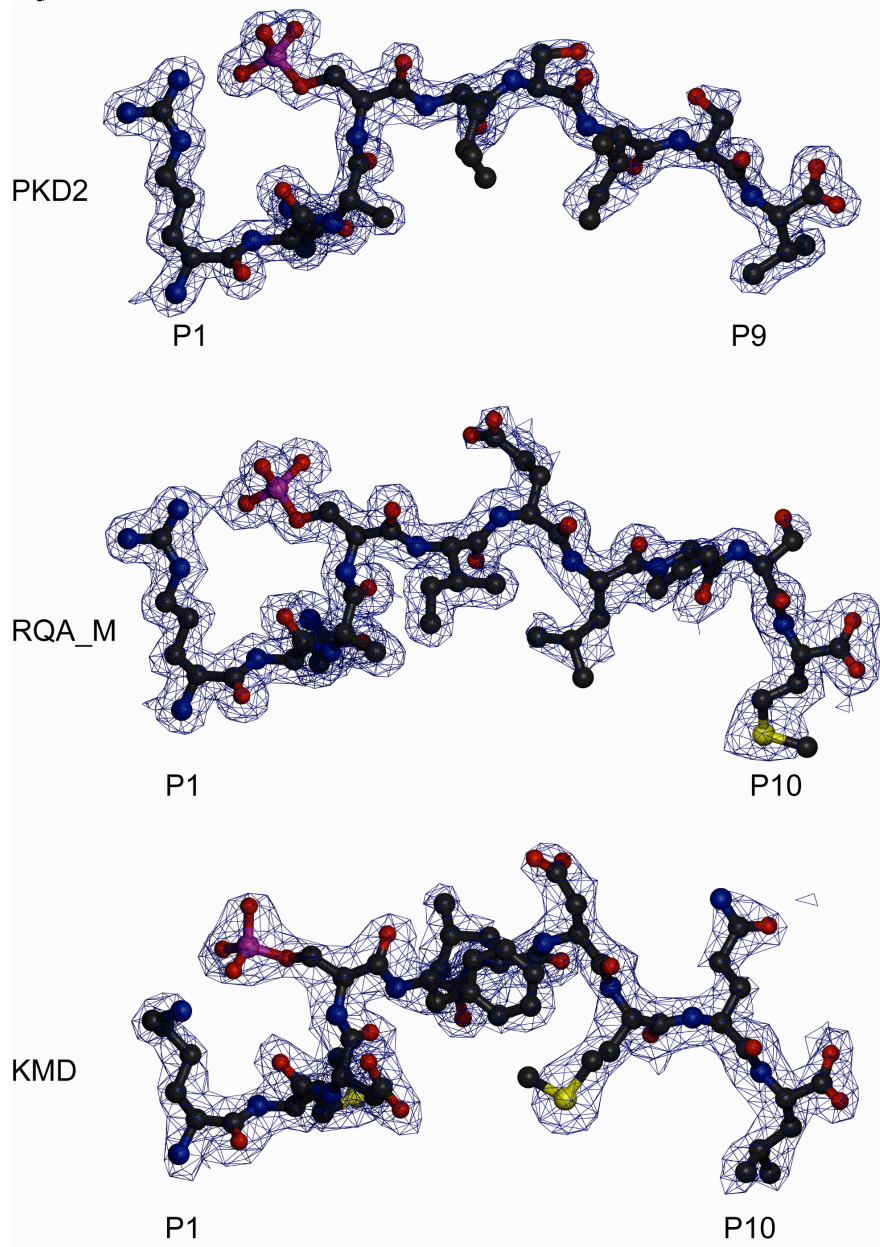

b

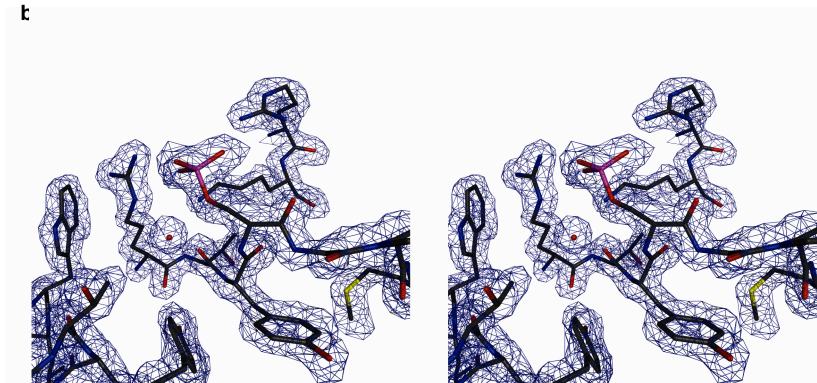

**Supplementary Figure 1.** Electron density representation of phosphopeptide structures.

(a) Structure of PKD2, RQA\_M and KMD phosphopeptides, each superimposed on a  $2F_o - F_c$  electron density map contoured at  $1.0 \sigma$  (blue wire). Sequences: RQApSLSISV (PKD2), RQApSIELPSM (RQA\_M), KMDpSFLDML (KMD). (b) Stereo diagram of PKD2 model in the region of the P4 phosphorylation site, superimposed on a  $2F_o - F_c$  electron density map contoured at  $1.0 \sigma$ , and presented for divergent viewing.

**Supplementary Table 1. Sequence anomalies among HLA-A\*0201 associated**

**phosphopeptides**

| Element            | Known HLA-A*0201 phosphopeptides <sup>a</sup> | Known non-phosphopeptide HLA-A*0201 ligands |                    | Predicted HLA-A*0201 phosphopeptide ligands |                          |  |
|--------------------|-----------------------------------------------|---------------------------------------------|--------------------|---------------------------------------------|--------------------------|--|
|                    |                                               | Immune Epitope <sup>b</sup>                 | B-LCL <sup>c</sup> | EMBL <sup>d</sup>                           | PhosphoSite <sup>e</sup> |  |
| <b>Phosphate</b>   |                                               |                                             |                    |                                             |                          |  |
| P4                 | 25 (68%)                                      | -                                           | -                  | 162 (13%)                                   | 311 (13%)                |  |
| Other              | 12 (32%)                                      | -                                           | -                  | 1064 (87%)                                  | 2058 (87%)               |  |
|                    |                                               |                                             |                    | <i>P</i> <0.0001                            | <i>P</i> <0.0001         |  |
| <b>P1</b>          |                                               |                                             |                    |                                             |                          |  |
| Arg, Lys           | 23 (62%)                                      | 78 (12%)                                    | 46 (8%)            | 52 (23%)                                    | 78 (25%)                 |  |
| Other              | 14 (38%)                                      | 591 (88%)                                   | 505 (92%)          | 172 (76%)                                   | 233 (75%)                |  |
|                    |                                               | <i>P</i> <0.0001                            | <i>P</i> <0.0001   | <i>P</i> <0.0001                            | <i>P</i> <0.0001         |  |
| <b>P2</b>          |                                               |                                             |                    |                                             |                          |  |
| Leu                | 19 (51%)                                      | 383 (57%)                                   | 381 (69%)          | -                                           | -                        |  |
| Met, Thr, Val, Gln | 18 (49%)                                      | 128 (19%)                                   | 86 (16%)           | -                                           | -                        |  |
| Other              | 0 (0%)                                        | 158 (24%)                                   | 84 (15%)           | -                                           | -                        |  |
|                    |                                               | <i>P</i> <0.0001                            | <i>P</i> <0.0001   |                                             |                          |  |
| <b>PC</b>          |                                               |                                             |                    |                                             |                          |  |
| Val, Leu           | 26 (70%)                                      | 445 (67%)                                   | 396 (72%)          | -                                           | -                        |  |
| Other              | 11 (30%)                                      | 224 (33%)                                   | 155 (28%)          | -                                           | -                        |  |
|                    |                                               | <i>P</i> =0.64                              | <i>P</i> =0.8343   |                                             |                          |  |

<sup>a</sup> HLA-A\*0201 associated phosphopeptides from Zarling, A.L., et al., *Proc Natl Acad Sci* **103**, 14889 (2006).

<sup>b</sup> peptide dataset of 669 9-10mer HLA-A\*0201 binding peptides from [www.immuneepitope.org](http://www.immuneepitope.org).

<sup>c</sup> peptide dataset of 551 9-10mer naturally processed peptides extracted from HLA-A\*0201 molecules associated with the JY B-LCL cell line (unpublished).

<sup>d</sup> dataset of 1,226 nonamer phosphopeptides predicted to bind to HLA-A\*0201 based on P2=L and P9=L or V from among 8,770 human p-Ser phosphorylation sites in the EMBL dataset (<http://phospho.elm.eu.org/>) (Diella, F., et al., *BMC Bioinformatics* **5**, 79 (2004)).

<sup>e</sup> dataset of 2,369 nonamer phosphopeptides predicted to bind to HLA-A\*0201 based on P2=L and P9=L or V from among 13,508 human pS phosphorylation sites in the Phosphosite dataset (<http://www.phosphosite.org>) (Hornbeck, P. V., et al., *Proteomics* **4**, 1551 (2004)).

*P* values were calculated using a two tailed chi-squared test for the contingency table generated from the A2 phosphopeptide and relevant comparative datasets.

**Supplementary Table 2. Ability of peptide binding algorithms to predict HLA-A2 restricted phosphopeptides**

|                              | HLA-A2 associated phosphopeptides <sup>a</sup> | HLA-A2 associated non-phosphorylated peptides <sup>b</sup> |
|------------------------------|------------------------------------------------|------------------------------------------------------------|
| <b>BIMAS<sup>c</sup></b>     |                                                |                                                            |
| Score ≥ 100                  | 7 (23%)                                        | 284 (52%)                                                  |
| Score <100                   | 23 (77%)                                       | 267 (48%)                                                  |
| (P=0.0026)                   |                                                |                                                            |
| <b>SYFPEITHI<sup>d</sup></b> |                                                |                                                            |
| Score ≥ 20                   | 20 (67%)                                       | 460 (83%)                                                  |
| Score <20                    | 10 (33%)                                       | 91 (17%)                                                   |
| (P =0.0179)                  |                                                |                                                            |

<sup>a</sup> from Zarling, A.L., et al., *Proc Natl Acad Sci* **103**, 14889 (2006).

<sup>b</sup> dataset of 551 9-10mer naturally processed peptides from B-LCL described in Methods.

<sup>c</sup> HLA-A\*0201 9mer and 10mer algorithms and suggested prediction threshold of 100 are from <http://www-bimas.cit.nih.gov/>.

<sup>d</sup> HLA-A\*0201 9mer and 10mer algorithms are from [www.syfpeithi.de/](http://www.syfpeithi.de/). The prediction threshold used was 20.

P values were calculated using a two tailed chi-squared test for the contingency table generated from the phosphopeptide and non-phosphorylated peptide datasets.

**Supplementary Table 3. Crystallization, data processing and refinement statistics for phosphopeptide-HLA-A2 complexes**

|                        | PKD2              | RQA_M                         | RTY                           | KMD                      |
|------------------------|-------------------|-------------------------------|-------------------------------|--------------------------|
| <b>Peptide</b>         |                   |                               |                               |                          |
| Sequence               | RQApSLSISV        | RQApSIELPSM                   | RTYpSGPMNKV                   | KMDpSFLDMQL              |
| Source                 | Protein kinase D2 | Lymphocyte specific protein 1 | Premature ovarian failure, 1B | Nedd4 binding protein 2  |
| <b>Crystallization</b> |                   |                               |                               |                          |
| Precipitant (%)        | PEG 8K (17)       | PEG 8K (17)                   | PEG 3350 (21)                 | PAA (24)                 |
| Buffer (0.1 M) pH 7.5  | Hepes             | Hepes                         | -                             | Hepes                    |
| Salt (M)               | -                 | -                             | NaSCN (0.1)                   | MgCl <sub>2</sub> (0.09) |
| HLA-A2 (mg/ml)         | 11                | 8                             | 15                            | 26                       |
| <b>Data Processing</b> |                   |                               |                               |                          |
| Resolution (Å)         | 20-1.6            | 20-1.65                       | 20-1.7                        | 20-2.2                   |
| Unit cell Parameters   |                   |                               |                               |                          |
| a (Å), b (Å)           | 117.8, 54.8       | 112.6, 55.1                   | 117.6, 53.1                   | 57.1, 80.2               |
| c (Å), β (°)           | 75.8, 105         | 75.9, 103.5                   | 75.7, 104.8                   | 57.3, 115.9              |
| Space Group            | C2                | C2                            | C2                            | P2 <sub>1</sub>          |
| Total reflections      | 380435            | 353305                        | 350718                        | 230491                   |
| Unique reflections     | 59358             | 50641                         | 46220                         | 22776                    |
| Multiplicity           | 6.4               | 7.0                           | 7.5                           | 10.1                     |
| Completeness (%)       | 96 (81.7)         | 92.8 (74.9)                   | 92.6 (64.4)                   | 95.8 (75.6)              |
| R <sub>merge</sub> (%) | 3.3 (44.1)        | 3.8 (66.4)                    | 4.4 (49)                      | 11.6 (33.3)              |
| I/σ(I)                 | 29.9 (3.1)        | 28.5 (2.6)                    | 28.5 (2.7)                    | 16.5 (4.8)               |
| <b>Refinement</b>      |                   |                               |                               |                          |
| Resolution (Å)         | 20-1.60           | 20-1.65                       | 20-1.70                       | 20-2.20                  |
| Reflections used       | 58959             | 50184                         | 45954                         | 22724                    |
| R <sub>cryst</sub> (%) | 20.1              | 20.0                          | 19.8                          | 22.5                     |
| R <sub>free</sub> (%)  | 23.2              | 23.1                          | 22.9                          | 25.6                     |
| Protein residues       | 383               | 384                           | 385                           | 382                      |
| Water molecules        | 400               | 368                           | 328                           | 119                      |
| RMS deviations         |                   |                               |                               |                          |
| Bond lengths (Å)       | 0.012             | 0.014                         | 0.013                         | 0.013                    |
| Bond angles (°)        | 1.31              | 1.34                          | 1.42                          | 1.57                     |

Figures in parentheses in the data processing section apply to data in the highest resolution shell.

**Supplementary Table 4. Conserved hydrogen bonding interactions between HLA-A2 and the N and C termini of phosphopeptides**

| Molecular Contacts        |          | PKD2                           | RQA_M      | RTY | KMD |
|---------------------------|----------|--------------------------------|------------|-----|-----|
| HLA-A2                    | Peptide  | Hydrogen bonding distances (Å) |            |     |     |
| Tyr7 (OH)                 | P1 (N)   | 2.9                            | 2.9        | 3.0 | 3.0 |
| Tyr171 (OH)               | P1 (N)   | 2.6                            | 2.7        | 2.8 | 2.7 |
| Tyr159 (OH)               | P1 (O)   | 2.7                            | 2.7        | 2.6 | 2.8 |
| Glu63 (O <sup>ε1</sup> )  | P2 (N)   | 3.0                            | 2.9        | 3.0 | 3.0 |
| Lys66 (N <sup>ε</sup> )   | P2 (O)   | 2.9                            | 2.9        | 2.9 | 2.9 |
| Tyr99 (OH)                | P3 (N)   | 3.0                            | 3.0        | 2.9 | 3.0 |
| Trp147 (N <sup>ε1</sup> ) | PC-1 (O) | 2.8                            | -          | 3.0 | 3.0 |
| Asp77 (O <sup>δ1</sup> )  | PC (N)   | 3.0                            | -          | 2.9 | 3.0 |
| Thr143 (O <sup>γ1</sup> ) | PC (OXT) | 2.7                            | 2.7        | 2.6 | 2.9 |
| Tyr84 (OH)                | PC (OXT) | 2.8                            | 2.7        | 2.8 | 3.1 |
| Lys146 (N <sup>ε</sup> )  | PC (OXT) | -                              | 3.0 (PC-1) | 3.2 | 3.1 |

**Supplementary Table 5. Stabilizing interactions involving the p-Ser moiety and HLA-A2**

| Molecular Contacts                |                    | PKD2                                  | RQA_M | RTY | KMD |
|-----------------------------------|--------------------|---------------------------------------|-------|-----|-----|
| <b><math>\alpha</math>1 helix</b> |                    |                                       |       |     |     |
| <b>HLA-A2</b>                     | <b>Peptide</b>     | <b>Hydrogen bonding distances (Å)</b> |       |     |     |
| Arg65 (NH2)                       | P4 (O2P)           | 2.9                                   | 2.8   | 3.0 | -   |
| Lys66 (N $\epsilon$ )             | P4 (O1P)           | 2.8                                   | 2.8   | 2.9 | 2.8 |
| Lys66 (N $\epsilon$ )             | P4 (O $\gamma$ )   | -                                     | -     | -   | 3.1 |
| <b>Intra-peptide</b>              |                    |                                       |       |     |     |
| P1 Arg (NH2)                      | P4 (O1P)           | 2.7                                   | 2.9   | 2.6 | -   |
| P1 Arg (N $\epsilon$ )            | P4 (O1P)           | -                                     | -     | 3.2 | -   |
| P1 Lys (N $\epsilon$ )            | P4 (O1P)           | -                                     | -     | -   | 2.9 |
| H <sub>2</sub> O (1)              | P2 (O)             | 2.8                                   | 2.9   | 2.8 | -   |
| H <sub>2</sub> O (1)              | P4 (O $\gamma$ )   | 3.0                                   | 3.0   | 2.9 | -   |
| H <sub>2</sub> O (1)              | P1 (N $\epsilon$ ) | 2.9                                   | 3.0   | 3.1 | -   |
| <b><math>\alpha</math>2 helix</b> |                    | <b>Number of hydrophobic contacts</b> |       |     |     |
| Trp167                            | P1 (Arg)           | 18                                    | 18    | 22  | -   |
| Trp167                            | P1 (Lys)           | -                                     | -     | -   | 15  |

**Supplementary Table 6A. van der Waals and hydrophobic contacts between P2 anchor and HLA-A2**

|                       | ILK                  | KMD                 | RTY                 | PKD2                | RQA_M               |
|-----------------------|----------------------|---------------------|---------------------|---------------------|---------------------|
| <b>P2 anchor</b>      | Leu                  | Met                 | Thr                 | Gln                 | Gln                 |
|                       | C <sup>α</sup> (6)   | C <sup>α</sup> (7)  | C <sup>α</sup> (5)  | C <sup>α</sup> (7)  | C <sup>α</sup> (7)  |
|                       | C <sup>β</sup> (6)   | C <sup>β</sup> (4)  | C <sup>β</sup> (6)  | C <sup>β</sup> (6)  | C <sup>β</sup> (6)  |
|                       | C <sup>γ1</sup> (7)  | C <sup>γ</sup> (9)  | O <sup>γ1</sup> (6) | C <sup>γ</sup> (8)  | C <sup>γ</sup> (6)  |
|                       | C <sup>γ2</sup> (16) | S <sup>δ</sup> (5)  | C <sup>γ2</sup> (9) | C <sup>δ</sup> (8)  | C <sup>δ</sup> (6)  |
|                       | C <sup>δ1</sup> (6)  | C <sup>ε</sup> (14) |                     | O <sup>ε1</sup> (8) | O <sup>ε1</sup> (8) |
|                       |                      |                     |                     | N <sup>ε2</sup> (8) | N <sup>ε2</sup> (8) |
| <b>Total contacts</b> | 41                   | 39                  | 26                  | 45                  | 41                  |

Value in parentheses correspond to the number of hydrophobic and van der Waals contacts mediated between the P2 anchor side chain atom and HLA-A\*0201. ILK contacts were determined from the structure of HLA-A2 complexed with HIV-1 reverse transcriptase peptide (PDB code 1HHJ). Two atoms are considered to be in contact if  $d_{ij} < r_i + r_j + t$  where  $d_{ij}$  is the distance between two non-bonded atoms  $i$  and  $j$ ,  $r_i$  is the van der Waals radius for atom  $i$ ,  $r_j$  is the van der Waals radius for atom  $j$  and  $t$  is the tolerance limit (1Å).



**Supplementary Table 6B. Hydrogen bonding interactions mediated between P2 Gln anchor and HLA-A2**

| Molecular contacts        |                          | PKD2          | RQA_M |
|---------------------------|--------------------------|---------------|-------|
| <b>Direct</b>             |                          |               |       |
| Peptide                   | HLA-A2                   | Distances (Å) |       |
| P2 Gln (N <sup>ε2</sup> ) | Glu63 (O <sup>ε1</sup> ) | 2.9           | 3.0   |
| P2 Gln (N <sup>ε2</sup> ) | Glu63 (O)                | 3.0           | 3.1   |
| P2 Gln (O <sup>ε1</sup> ) | H <sub>2</sub> O (2)     | 2.8           | 2.8   |
| <b>Water mediated</b>     |                          |               |       |
| H <sub>2</sub> O (2)      | Tyr99 (OH)               | 2.8           | 2.9   |
| H <sub>2</sub> O (2)      | His70 (N <sup>δ1</sup> ) | 2.9           | -     |
| H <sub>2</sub> O (2)      | H <sub>2</sub> O (3)     | 2.7           | 2.7   |
| H <sub>2</sub> O (3)      | P3 (O)                   | 2.6           | 2.6   |

**Supplementary Table 6C. van der Waals and hydrophobic contacts between PC anchor and HLA-A2**

|                       | ILK                  | PKD2                 | RTY                  | KMD                  | RQA_M              |
|-----------------------|----------------------|----------------------|----------------------|----------------------|--------------------|
| <b>PC anchor</b>      | Val                  | Val                  | Val                  | Leu                  | Met                |
|                       | C <sup>α</sup> (7)   | C <sup>α</sup> (6)   | C <sup>α</sup> (4)   | C <sup>α</sup> (4)   | C <sup>α</sup> (3) |
|                       | C <sup>β</sup> (5)   | C <sup>β</sup> (5)   | C <sup>β</sup> (6)   | C <sup>β</sup> (6)   | C <sup>β</sup> (5) |
|                       | C <sup>γ1</sup> (13) | C <sup>γ1</sup> (13) | C <sup>γ1</sup> (12) | C <sup>γ</sup> (7)   | C <sup>γ</sup> (7) |
|                       | C <sup>γ2</sup> (10) | C <sup>γ2</sup> (10) | C <sup>γ2</sup> (12) | C <sup>δ1</sup> (11) | S <sup>δ</sup> (6) |
|                       |                      |                      |                      | C <sup>δ2</sup> (12) | C <sup>ε</sup> (7) |
| <b>Total contacts</b> | 35                   | 34                   | 34                   | 40                   | 28                 |

Value in parentheses correspond to the number of hydrophobic and van der Waals contacts mediated between the PC anchor side chain atom and HLA-A\*0201. ILK contacts were determined from the structure of HLA-A2 complexed with HIV-1 reverse transcriptase peptide (PDB code 1HHJ). Van der Waals contacts calculated as in Supplementary Table 6a.
